# Supplementary material for: Genetic parallels in biomineralization of the calcareous sponge Sycon ciliatum and stony corals
Source: bioRxiv preprint, doi:10.1101/2025.02.06.636789, version 3 (2025-06-11)
Supplement: Dataset S1 [file 636789_file03.xlsx]

## Sheet: Revigo_BP_Scatterplot_osc_over
TermID	Name	Value	LogSize	Frequency	Uniqueness	Dispensability	PC_0	PC_1	Representative	Representative term
GO:0001501	skeletal system development	-4.10791	4.40703	0.0849107	0.539013	0.638856	-5.17376	-3.22427	null	skeletal system development
GO:0001503	ossification	-3.76955	4.13104	0.0449733	0.738853	0	-6.22739	-0.742451	null	ossification
GO:0001708	cell fate specification	-6.88606	3.99458	0.032846	0.592134	0.572121	-4.63006	-4.93258	null	cell fate specification
GO:0001763	morphogenesis of a branching structure	-3.85387	3.94949	0.0296063	0.565682	0.596428	-5.53583	-3.63097	null	morphogenesis of a branching structure
GO:0001822	kidney development	-5.72125	4.12352	0.0442016	0.514561	0.605688	-5.38303	-3.52019	null	kidney development
GO:0001656	metanephros development	-2.4034	3.48473	0.0101515	0.54912	0.904144	null	null	1822	kidney development
GO:0001657	ureteric bud development	-3.3098	3.52192	0.0110596	0.515117	0.908745	null	null	1822	kidney development
GO:0001823	mesonephros development	-3.23657	3.55084	0.0118212	0.545738	0.912355	null	null	1822	kidney development
GO:0032835	glomerulus development	-2.50169	3.39287	0.00821567	0.553068	0.892977	null	null	1822	kidney development
GO:0061326	renal tubule development	-3.52288	3.60444	0.0133746	0.526687	0.919123	null	null	1822	kidney development
GO:0061333	renal tubule morphogenesis	-2.83565	3.48244	0.0100983	0.515305	0.903863	null	null	1822	kidney development
GO:0061437	renal system vasculature development	-3.92082	2.86629	0.00244142	0.583798	0.833908	null	null	1822	kidney development
GO:0061440	kidney vasculature development	-3.92082	2.86629	0.00244142	0.566493	0.995838	null	null	1822	kidney development
GO:0072006	nephron development	-3.63827	3.7611	0.0191854	0.534647	0.939488	null	null	1822	kidney development
GO:0072012	glomerulus vasculature development	-3.92082	2.82802	0.00223519	0.567481	0.829915	null	null	1822	kidney development
GO:0072073	kidney epithelium development	-3.14874	3.75967	0.0191222	0.508663	0.939298	null	null	1822	kidney development
GO:0072080	nephron tubule development	-2.59517	3.52479	0.0111327	0.514213	0.974495	null	null	1822	kidney development
GO:0072163	mesonephric epithelium development	-3.23657	3.52608	0.011166	0.519998	0.993093	null	null	1822	kidney development
GO:0072164	mesonephric tubule development	-3.23657	3.52608	0.011166	0.514894	0.999362	null	null	1822	kidney development
GO:0001867	complement activation, lectin pathway	-2.63827	2.53403	0.00113423	0.803929	0.572812	2.85995	-1.50514	null	complement activation, lectin pathway
GO:0002455	humoral immune response mediated by circulating immunoglobulin	-2.51145	3.65466	0.0150144	0.935488	0.77309	null	null	1867	complement activation, lectin pathway
GO:0001944	vasculature development	-5.46852	4.44929	0.0935887	0.520089	0.644113	-5.32644	-3.28124	null	vasculature development
GO:0001525	angiogenesis	-4.17393	4.24541	0.0585241	0.497867	0.961946	null	null	1944	vasculature development
GO:0001568	blood vessel development	-4.13668	4.41944	0.0873721	0.520419	0.917475	null	null	1944	vasculature development
GO:0003007	heart morphogenesis	-3.67778	4.07423	0.0394585	0.49833	0.868235	null	null	1944	vasculature development
GO:0003205	cardiac chamber development	-3.74473	3.82092	0.0220193	0.533419	0.835337	null	null	1944	vasculature development
GO:0003206	cardiac chamber morphogenesis	-3.63827	3.6909	0.0163216	0.519927	0.8194	null	null	1944	vasculature development
GO:0007507	heart development	-5.45593	4.42311	0.0881139	0.500423	0.918029	null	null	1944	vasculature development
GO:0010002	cardioblast differentiation	-3.79588	2.85854	0.00239818	0.568117	0.730176	null	null	1944	vasculature development
GO:0014706	striated muscle tissue development	-2.61439	3.8654	0.0243942	0.580841	0.920397	null	null	1944	vasculature development
GO:0035051	cardiocyte differentiation	-3.46852	3.67706	0.0158093	0.529473	0.817739	null	null	1944	vasculature development
GO:0035914	skeletal muscle cell differentiation	-2.33724	3.36568	0.00771674	0.555611	0.860966	null	null	1944	vasculature development
GO:0048514	blood vessel morphogenesis	-3.72125	4.34885	0.0742636	0.496103	0.978027	null	null	1944	vasculature development
GO:0048738	cardiac muscle tissue development	-2.78516	3.8496	0.0235228	0.506864	0.838936	null	null	1944	vasculature development
GO:0060911	cardiac cell fate commitment	-2.63827	2.72428	0.00175955	0.571011	0.810795	null	null	1944	vasculature development
GO:0060912	cardiac cell fate specification	-2.92082	1.99564	0.000325966	0.601215	0.752054	null	null	1944	vasculature development
GO:0002067	glandular epithelial cell differentiation	-2.97881	3.49052	0.0102879	0.574451	0.683475	-4.80842	-5.02936	null	glandular epithelial cell differentiation
GO:0002064	epithelial cell development	-2.64397	4.03125	0.0357398	0.543382	0.842426	null	null	2067	glandular epithelial cell differentiation
GO:0002065	columnar/cuboidal epithelial cell differentiation	-2.67572	3.68215	0.0159956	0.565635	0.783893	null	null	2067	glandular epithelial cell differentiation
GO:0061101	neuroendocrine cell differentiation	-2.95468	2.83632	0.00227843	0.560755	0.879577	null	null	2067	glandular epithelial cell differentiation
GO:0002683	negative regulation of immune system process	-2.54363	4.33524	0.0719719	0.862566	0.623825	4.49994	-5.75096	null	negative regulation of immune system process
GO:0002695	negative regulation of leukocyte activation	-2.46852	3.91174	0.0271416	0.836011	0.752039	null	null	2683	negative regulation of immune system process
GO:0042130	negative regulation of T cell proliferation	-2.45967	3.44607	0.0092867	0.815604	0.929863	null	null	2683	negative regulation of immune system process
GO:0050868	negative regulation of T cell activation	-2.67162	3.72665	0.0177219	0.819734	0.965525	null	null	2683	negative regulation of immune system process
GO:0003008	system process	-3.5376	5.40542	0.845987	0.685319	0.585744	-6.00321	-0.849112	null	system process
GO:0008015	blood circulation	-2.33819	4.47419	0.0991102	0.72425	0.798486	null	null	3008	system process
GO:0050877	nervous system process	-2.55284	5.33444	0.718428	0.686689	0.75293	null	null	3008	system process
GO:0006801	superoxide metabolic process	-3.04096	4.59093	0.129678	0.990568	0.0192342	-5.76021	4.23343	null	superoxide metabolic process
GO:0019430	removal of superoxide radicals	-2.3279	4.49404	0.103747	0.915276	0.876036	null	null	6801	superoxide metabolic process
GO:0006820	monoatomic anion transport	-2.42251	5.15662	0.477044	0.989359	0.250034	-0.829116	3.56666	null	monoatomic anion transport
GO:0006897	endocytosis	-5.65758	5.00777	0.338619	0.972482	0	-0.652349	3.03696	null	endocytosis
GO:0006898	receptor-mediated endocytosis	-2.6073	4.25684	0.0600841	0.973383	0.769159	null	null	6897	endocytosis
GO:0006909	phagocytosis	-3.06048	3.90741	0.0268722	0.974432	0.724665	null	null	6897	endocytosis
GO:0006910	phagocytosis, recognition	-4.36653	2.75205	0.00187597	0.971832	0.60826	-0.88762	2.90222	null	phagocytosis, recognition
GO:0043652	engulfment of apoptotic cell	-2.45967	2.72181	0.00174957	0.940046	0.866466	null	null	6910	phagocytosis, recognition
GO:0043654	recognition of apoptotic cell	-2.50031	2.40483	0.000841524	0.972081	0.728391	null	null	6910	phagocytosis, recognition
GO:0006935	chemotaxis	-4.60206	5.22759	0.561732	0.916432	0.449315	4.91976	2.37623	null	chemotaxis
GO:0042330	taxis	-4.42022	5.22912	0.563718	0.920822	0.988937	null	null	6935	chemotaxis
GO:0006959	humoral immune response	-4.03621	4.08718	0.0406526	0.932769	0.267648	3.95222	2.17747	null	humoral immune response
GO:0007154	cell communication	-6.18046	6.41567	8.66189	0.99362	0.0142195	-6.73142	3.15122	null	cell communication
GO:0007155	cell adhesion	-15.4949	5.32691	0.706078	0.994908	0.00816729	2.46323	5.30457	null	cell adhesion
GO:0007157	heterophilic cell-cell adhesion via plasma membrane cell adhesion molecules	-2.87615	3.37199	0.00782983	0.9683	0.643384	-4.34447	5.05031	null	heterophilic cell-cell adhesion via plasma membrane cell adhesion molecules
GO:0007165	signal transduction	-6.60206	6.38845	8.13579	0.779233	0.687346	4.54335	-1.8459	null	signal transduction
GO:0051716	cellular response to stimulus	-4.45593	6.55784	12.0168	0.906203	0.707679	null	null	7165	signal transduction
GO:0007166	cell surface receptor signaling pathway	-13.3188	5.55489	1.19353	0.814006	0.0104197	4.61599	-1.49924	null	cell surface receptor signaling pathway
GO:0007167	enzyme-linked receptor protein signaling pathway	-7.11919	4.84959	0.235251	0.819034	0.439821	4.84414	-1.15903	null	enzyme-linked receptor protein signaling pathway
GO:0007178	transmembrane receptor protein serine/threonine kinase signaling pathway	-5.85387	4.36795	0.0776031	0.827073	0.662257	5.05293	-0.908112	null	transmembrane receptor protein serine/threonine kinase signaling pathway
GO:0007169	transmembrane receptor protein tyrosine kinase signaling pathway	-4.48149	4.67249	0.156467	0.818838	0.886551	null	null	7178	transmembrane receptor protein serine/threonine kinase signaling pathway
GO:0007186	G protein-coupled receptor signaling pathway	-5	5.6786	1.58687	0.809536	0.537767	4.62438	-1.59777	null	G protein-coupled receptor signaling pathway
GO:0007188	adenylate cyclase-modulating G protein-coupled receptor signaling pathway	-5.21467	4.2876	0.0644946	0.848764	0.391483	4.63011	-0.725473	null	adenylate cyclase-modulating G protein-coupled receptor signaling pathway
GO:0007189	adenylate cyclase-activating G protein-coupled receptor signaling pathway	-4.65758	3.87506	0.024943	0.857567	0.52135	4.75069	-0.391119	null	adenylate cyclase-activating G protein-coupled receptor signaling pathway
GO:0007229	integrin-mediated signaling pathway	-3.40894	4.43916	0.0914301	0.830363	0.670579	4.9523	-0.954158	null	integrin-mediated signaling pathway
GO:0007266	Rho protein signal transduction	-2.34486	4.03695	0.0362121	0.85533	0.37319	4.97551	-0.547935	null	Rho protein signal transduction
GO:0007267	cell-cell signaling	-5.88606	5.10162	0.420303	0.871117	0.461852	4.79187	-2.57249	null	cell-cell signaling
GO:0007431	salivary gland development	-4.08619	3.26975	0.0061867	0.574739	0.523782	-5.65215	-3.37131	null	salivary gland development
GO:0022612	gland morphogenesis	-2.39577	3.66614	0.0154168	0.560605	0.798962	null	null	7431	salivary gland development
GO:0007492	endoderm development	-3.76955	3.59129	0.0129754	0.597183	0.693556	-5.03645	-5.05311	null	endoderm development
GO:0007613	memory	-2.88606	3.60927	0.0135243	0.753907	0.439935	-6.19708	-0.573784	null	memory
GO:0008037	cell recognition	-2.69037	4.41963	0.0874087	0.995637	0.00695356	-3.05898	5.90818	null	cell recognition
GO:0008283	cell population proliferation	-2.80134	4.52267	0.110815	0.995565	0.00831348	-6.32605	3.6807	null	cell population proliferation
GO:0008347	glial cell migration	-3.08619	3.2393	0.0057676	0.569349	0.667104	-5.4046	-2.69889	null	glial cell migration
GO:0010001	glial cell differentiation	-2.91364	3.90849	0.0269387	0.540648	0.886605	null	null	8347	glial cell migration
GO:0009605	response to external stimulus	-4.85387	5.766	1.94065	0.925628	0.391256	5.33204	2.00316	null	response to external stimulus
GO:0009611	response to wounding	-3.56864	4.55445	0.11923	0.935952	0.293453	5.79299	2.08483	null	response to wounding
GO:0009617	response to bacterium	-3.24413	4.64262	0.146069	0.927504	0.660188	4.42278	2.52926	null	response to bacterium
GO:0009653	anatomical structure morphogenesis	-14.0862	5.37151	0.782454	0.532367	0	-4.92028	-4.44524	null	anatomical structure morphogenesis
GO:0000904	cell morphogenesis involved in differentiation	-6.52288	4.65707	0.151009	0.518282	0.812706	null	null	9653	anatomical structure morphogenesis
GO:0007275	multicellular organism development	-11.3768	5.56635	1.22545	0.495534	0.888346	null	null	9653	anatomical structure morphogenesis
GO:0007399	nervous system development	-8.50864	5.19464	0.5207	0.487082	0.888047	null	null	9653	anatomical structure morphogenesis
GO:0007409	axonogenesis	-6.76955	4.53387	0.113712	0.461677	0.95103	null	null	9653	anatomical structure morphogenesis
GO:0007411	axon guidance	-5.82391	4.38193	0.080141	0.427188	0.966066	null	null	9653	anatomical structure morphogenesis
GO:0009790	embryo development	-4.79588	4.83527	0.227621	0.517167	0.818849	null	null	9653	anatomical structure morphogenesis
GO:0009888	tissue development	-13.2441	5.09817	0.41698	0.550893	0.737274	null	null	9653	anatomical structure morphogenesis
GO:0022008	neurogenesis	-10.0044	4.98231	0.31934	0.478452	0.871262	null	null	9653	anatomical structure morphogenesis
GO:0030154	cell differentiation	-11.7696	5.45963	0.958456	0.509214	0.775325	null	null	9653	anatomical structure morphogenesis
GO:0030182	neuron differentiation	-7.3098	4.8831	0.25412	0.480337	0.966336	null	null	9653	anatomical structure morphogenesis
GO:0031175	neuron projection development	-5.65758	4.6845	0.160854	0.471855	0.940346	null	null	9653	anatomical structure morphogenesis
GO:0032989	cellular component morphogenesis	-4.3279	4.67336	0.156783	0.50863	0.815452	null	null	9653	anatomical structure morphogenesis
GO:0032990	cell part morphogenesis	-4.85387	4.60823	0.134946	0.507401	0.963292	null	null	9653	anatomical structure morphogenesis
GO:0048468	cell development	-9.03621	5.20912	0.538342	0.516624	0.917353	null	null	9653	anatomical structure morphogenesis
GO:0048513	animal organ development	-11.4815	5.25909	0.603998	0.540163	0.764703	null	null	9653	anatomical structure morphogenesis
GO:0048666	neuron development	-5.31876	4.78567	0.203053	0.484656	0.94839	null	null	9653	anatomical structure morphogenesis
GO:0048667	cell morphogenesis involved in neuron differentiation	-5	4.57427	0.124798	0.479014	0.963319	null	null	9653	anatomical structure morphogenesis
GO:0048699	generation of neurons	-8.88606	4.92413	0.279303	0.478324	0.899671	null	null	9653	anatomical structure morphogenesis
GO:0048731	system development	-13.5086	5.50882	1.0734	0.468488	0.811556	null	null	9653	anatomical structure morphogenesis
GO:0048812	neuron projection morphogenesis	-4.67778	4.59333	0.130396	0.457825	0.987718	null	null	9653	anatomical structure morphogenesis
GO:0048856	anatomical structure development	-11.5086	5.7896	2.04899	0.513982	0.874372	null	null	9653	anatomical structure morphogenesis
GO:0048858	cell projection morphogenesis	-5	4.59727	0.131584	0.504306	0.994172	null	null	9653	anatomical structure morphogenesis
GO:0048869	cellular developmental process	-11.5086	5.49107	1.03041	0.534262	0.798466	null	null	9653	anatomical structure morphogenesis
GO:0061564	axon development	-9	4.55688	0.119899	0.479976	0.908759	null	null	9653	anatomical structure morphogenesis
GO:0097485	neuron projection guidance	-5.76955	4.38412	0.0805468	0.427223	0.954258	null	null	9653	anatomical structure morphogenesis
GO:0120039	plasma membrane bounded cell projection morphogenesis	-4.60206	4.59562	0.131085	0.504357	0.997717	null	null	9653	anatomical structure morphogenesis
GO:0009719	response to endogenous stimulus	-2.70333	5.29355	0.653877	0.932287	0.346255	5.41163	2.1739	null	response to endogenous stimulus
GO:0009791	post-embryonic development	-3.21467	4.66683	0.154441	0.528025	0.672606	-5.19451	-3.53444	null	post-embryonic development
GO:0010092	specification of animal organ identity	-2.63827	2.87332	0.00248133	0.569805	0.699884	-5.73557	-3.24016	null	specification of animal organ identity
GO:0010160	formation of animal organ boundary	-2.3019	2.4183	0.000868133	0.589496	0.859762	null	null	10092	specification of animal organ identity
GO:0010453	regulation of cell fate commitment	-2.5376	3.24969	0.0059073	0.866265	0.553912	6.24732	-3.5278	null	regulation of cell fate commitment
GO:0010623	programmed cell death involved in cell development	-2.37572	3.16435	0.0048529	0.622971	0.584368	-4.51438	-5.18686	null	programmed cell death involved in cell development
GO:0010646	regulation of cell communication	-2.74473	5.45497	0.948234	0.880115	0.278439	4.0526	-4.44058	null	regulation of cell communication
GO:0010712	regulation of collagen metabolic process	-2.63827	3.02857	0.00354903	0.921207	0.159033	0.666406	-8.15019	null	regulation of collagen metabolic process
GO:0010810	regulation of cell-substrate adhesion	-3.67778	3.91046	0.0270618	0.880843	0.200115	5.86832	-4.72338	null	regulation of cell-substrate adhesion
GO:0010811	positive regulation of cell-substrate adhesion	-3.56864	3.64836	0.0147982	0.851293	0.79968	null	null	10810	regulation of cell-substrate adhesion
GO:0022407	regulation of cell-cell adhesion	-3.11351	4.27152	0.0621497	0.874681	0.873251	null	null	10810	regulation of cell-substrate adhesion
GO:0022408	negative regulation of cell-cell adhesion	-3.13668	3.90374	0.026646	0.847728	0.82828	null	null	10810	regulation of cell-substrate adhesion
GO:0033630	positive regulation of cell adhesion mediated by integrin	-2.50031	2.88762	0.00256449	0.864783	0.725069	null	null	10810	regulation of cell-substrate adhesion
GO:0045785	positive regulation of cell adhesion	-2.61261	4.21785	0.0549252	0.839631	0.914763	null	null	10810	regulation of cell-substrate adhesion
GO:1903038	negative regulation of leukocyte cell-cell adhesion	-2.5817	3.75906	0.0190956	0.850163	0.932133	null	null	10810	regulation of cell-substrate adhesion
GO:0016477	cell migration	-4.88606	4.73941	0.182534	0.975402	0.00868198	-6.61854	2.28221	null	cell migration
GO:0001764	neuron migration	-3.17393	3.85248	0.0236791	0.53826	0.731398	null	null	16477	cell migration
GO:0021510	spinal cord development	-2.77211	3.76819	0.0195014	0.541056	0.670221	-5.50385	-3.29692	null	spinal cord development
GO:0007420	brain development	-2.50446	4.50491	0.106375	0.497602	0.844343	null	null	21510	spinal cord development
GO:0021515	cell differentiation in spinal cord	-2.40561	3.61669	0.0137571	0.538376	0.745281	null	null	21510	spinal cord development
GO:0030900	forebrain development	-2.40782	4.1878	0.0512531	0.517095	0.938655	null	null	21510	spinal cord development
GO:0021535	cell migration in hindbrain	-2.82391	2.76938	0.00195247	0.582033	0.624971	-5.58235	-2.65035	null	cell migration in hindbrain
GO:0022404	molting cycle process	-2.9393	3.5214	0.0110462	0.753539	0.434641	-5.97342	-0.479013	null	molting cycle process
GO:0022405	hair cycle process	-2.64016	3.44994	0.00936985	0.755671	0.950375	null	null	22404	molting cycle process
GO:0042633	hair cycle	-2.34294	3.48387	0.0101315	0.754663	0.954433	null	null	22404	molting cycle process
GO:0023051	regulation of signaling	-2.74958	5.45754	0.953869	0.886071	0.257	4.45496	-3.90549	null	regulation of signaling
GO:0023052	signaling	-6.5376	6.39563	8.27138	0.861458	0.341208	3.986	-4.07348	null	signaling
GO:0030030	cell projection organization	-3.85387	5.29821	0.660922	0.948793	0.490501	0.361118	5.88812	null	cell projection organization
GO:0030036	actin cytoskeleton organization	-2.4698	4.98481	0.321183	0.951489	0.456209	0.359134	6.17048	null	actin cytoskeleton organization
GO:0030111	regulation of Wnt signaling pathway	-2.94692	4.43995	0.0915964	0.844513	0.691587	2.74079	-5.92982	null	regulation of Wnt signaling pathway
GO:0010647	positive regulation of cell communication	-2.86967	4.94166	0.290801	0.817789	0.718949	null	null	30111	regulation of Wnt signaling pathway
GO:0023056	positive regulation of signaling	-2.82102	4.94108	0.290415	0.822863	0.71792	null	null	30111	regulation of Wnt signaling pathway
GO:0030155	regulation of cell adhesion	-4.67778	4.51704	0.109388	0.897915	0.224969	5.35912	-4.31325	null	regulation of cell adhesion
GO:0030198	extracellular matrix organization	-15.8861	4.43127	0.0897836	0.947265	0	0.0438375	6.18587	null	extracellular matrix organization
GO:0030199	collagen fibril organization	-3.16115	3.38399	0.00804936	0.954127	0.849601	null	null	30198	extracellular matrix organization
GO:0071711	basement membrane organization	-5.07058	3.14426	0.00463337	0.955474	0.821991	null	null	30198	extracellular matrix organization
GO:0085029	extracellular matrix assembly	-2.34486	3.15746	0.0047764	0.954054	0.823464	null	null	30198	extracellular matrix organization
GO:0030282	bone mineralization	-3.3098	3.52453	0.0111261	0.554425	0.686844	-5.37619	-3.78311	null	bone mineralization
GO:0034505	tooth mineralization	-2.95468	2.7679	0.00194582	0.586454	0.854685	null	null	30282	bone mineralization
GO:0030308	negative regulation of cell growth	-3.92082	3.78533	0.0202864	0.865734	0.483982	4.42293	-6.07951	null	negative regulation of cell growth
GO:0045926	negative regulation of growth	-3.21467	4.02755	0.0354371	0.871035	0.808156	null	null	30308	negative regulation of cell growth
GO:0048640	negative regulation of developmental growth	-2.79588	3.68583	0.016132	0.827489	0.921648	null	null	30308	negative regulation of cell growth
GO:0030335	positive regulation of cell migration	-2.30277	4.31027	0.0679505	0.860934	0.483228	2.72668	-4.3265	null	positive regulation of cell migration
GO:0030574	collagen catabolic process	-3.08092	3.39655	0.00828552	0.999626	0.0163067	-4.8183	3.34868	null	collagen catabolic process
GO:0032501	multicellular organismal process	-9.37675	5.8523	2.36724	1	0	4.1188	5.46212	null	multicellular organismal process
GO:0032502	developmental process	-10.6198	5.84119	2.30746	1	0	-5.70994	3.38976	null	developmental process
GO:0032526	response to retinoic acid	-4.72125	3.50433	0.0106205	0.939993	0.24119	4.93606	3.02204	null	response to retinoic acid
GO:0032963	collagen metabolic process	-4.39794	3.71147	0.0171132	0.999612	0	2.3782	6.1469	null	collagen metabolic process
GO:0033627	cell adhesion mediated by integrin	-7.24413	3.13258	0.0045103	0.971382	0.620981	-4.4809	4.88704	null	cell adhesion mediated by integrin
GO:0033631	cell-cell adhesion mediated by integrin	-3.58503	2.46389	0.000964592	0.971582	0.565879	-4.18539	5.07382	null	cell-cell adhesion mediated by integrin
GO:0034113	heterotypic cell-cell adhesion	-4.35655	3.03743	0.00362221	0.969685	0.612502	-4.21589	4.91222	null	heterotypic cell-cell adhesion
GO:0034330	cell junction organization	-7.52288	4.34278	0.0732325	0.956248	0.330806	0.595148	5.83369	null	cell junction organization
GO:0035023	regulation of Rho protein signal transduction	-2.45469	3.78845	0.0204327	0.857545	0.693809	2.37581	-6.39704	null	regulation of Rho protein signal transduction
GO:0035215	genital disc development	-2.45967	2.54158	0.00115418	0.639657	0.469563	-4.7811	-5.40235	null	genital disc development
GO:0035272	exocrine system development	-4.25964	3.44279	0.00921685	0.590117	0.538546	-5.61675	-2.94784	null	exocrine system development
GO:0035295	tube development	-6.22185	4.66363	0.15331	0.528226	0.67217	-5.1268	-3.44345	null	tube development
GO:0035567	non-canonical Wnt signaling pathway	-5.58503	3.24229	0.00580751	0.849386	0.553636	5.43615	-0.265899	null	non-canonical Wnt signaling pathway
GO:0016055	Wnt signaling pathway	-4.74473	4.70171	0.167357	0.815011	0.790218	null	null	35567	non-canonical Wnt signaling pathway
GO:0060070	canonical Wnt signaling pathway	-4.35655	3.87181	0.0247568	0.836269	0.86818	null	null	35567	non-canonical Wnt signaling pathway
GO:0198738	cell-cell signaling by wnt	-4.72125	4.70276	0.167763	0.867144	0.852519	null	null	35567	non-canonical Wnt signaling pathway
GO:1905114	cell surface receptor signaling pathway involved in cell-cell signaling	-4.46852	4.88961	0.257959	0.81108	0.882385	null	null	35567	non-canonical Wnt signaling pathway
GO:0035581	sequestering of extracellular ligand from receptor	-2.47625	2.60959	0.00135043	0.845155	0.457148	2.8419	-6.91046	null	sequestering of extracellular ligand from receptor
GO:0035583	sequestering of TGFbeta in extracellular matrix	-2.50446	2.26007	0.000602039	0.821244	0.956165	null	null	35581	sequestering of extracellular ligand from receptor
GO:1900116	extracellular negative regulation of signal transduction	-2.47625	2.65514	0.00150011	0.844375	0.993505	null	null	35581	sequestering of extracellular ligand from receptor
GO:0035821	modulation of process of another organism	-2.82974	4.47293	0.0988242	0.993941	0.673473	2.17367	4.18388	null	modulation of process of another organism
GO:0036363	transforming growth factor beta activation	-2.92082	1.94939	0.000292704	0.907342	0.266307	6.82539	-0.484905	null	transforming growth factor beta activation
GO:0040007	growth	-3.58503	4.45793	0.095468	1	0	3.51006	5.49557	null	growth
GO:0040011	locomotion	-4.79588	5.2403	0.578416	1	0	-2.46506	6.16806	null	locomotion
GO:0042060	wound healing	-3.25181	4.3901	0.0816644	0.931002	0.414193	5.83833	2.22306	null	wound healing
GO:0042063	gliogenesis	-3.25181	4.01532	0.0344526	0.535655	0.593919	-4.99035	-3.47557	null	gliogenesis
GO:0007417	central nervous system development	-2.72125	4.65243	0.149405	0.514523	0.722447	null	null	42063	gliogenesis
GO:0042127	regulation of cell population proliferation	-3.65758	4.85664	0.239103	0.892135	0.241781	4.76347	-4.35973	null	regulation of cell population proliferation
GO:0042221	response to chemical	-2.32148	6.02825	3.54971	0.921342	0.44983	5.15384	2.03957	null	response to chemical
GO:0042303	molting cycle	-2.44977	3.68314	0.0160322	0.753614	0.444486	-5.81862	-0.529685	null	molting cycle
GO:0042386	hemocyte differentiation	-2.40561	2.25285	0.00059206	0.662173	0.524164	-4.02081	-4.91364	null	hemocyte differentiation
GO:0042659	regulation of cell fate specification	-2.67162	3.09587	0.00414442	0.868805	0.541812	6.39933	-3.28883	null	regulation of cell fate specification
GO:0042688	crystal cell differentiation	-2.84466	1.97772	0.000312661	0.669211	0.507825	-3.95841	-4.74946	null	crystal cell differentiation
GO:0042387	plasmatocyte differentiation	-2.63827	1.89209	0.000256116	0.672012	0.942208	null	null	42688	crystal cell differentiation
GO:0042692	muscle cell differentiation	-6.284	4.09047	0.0409619	0.576324	0.609374	-4.61365	-4.64325	null	muscle cell differentiation
GO:0007517	muscle organ development	-3.5376	4.26425	0.0611186	0.551703	0.918679	null	null	42692	muscle cell differentiation
GO:0045445	myoblast differentiation	-4.85387	3.18441	0.0050824	0.619355	0.789503	null	null	42692	muscle cell differentiation
GO:0048627	myoblast development	-3.4318	2.33846	0.000721781	0.648042	0.71104	null	null	42692	muscle cell differentiation
GO:0051145	smooth muscle cell differentiation	-4.56864	3.16997	0.0049161	0.619604	0.788021	null	null	42692	muscle cell differentiation
GO:0055001	muscle cell development	-4.39794	3.90108	0.0264831	0.581811	0.87077	null	null	42692	muscle cell differentiation
GO:0060379	cardiac muscle cell myoblast differentiation	-2.5986	2.64345	0.00146019	0.570585	0.860706	null	null	42692	muscle cell differentiation
GO:0043062	extracellular structure organization	-15.699	4.44176	0.0919789	0.955574	0.336189	0.606049	6.09623	null	extracellular structure organization
GO:0043068	positive regulation of programmed cell death	-2.85078	4.37269	0.0784546	0.854877	0.632674	2.87689	-4.77267	null	positive regulation of programmed cell death
GO:0043410	positive regulation of MAPK cascade	-3.46852	4.36575	0.0772106	0.818515	0.682194	2.63186	-5.53384	null	positive regulation of MAPK cascade
GO:0009967	positive regulation of signal transduction	-2.6517	4.90915	0.269833	0.80389	0.890516	null	null	43410	positive regulation of MAPK cascade
GO:0043588	skin development	-3.04096	3.99528	0.0328993	0.575172	0.645149	-5.2184	-4.62356	null	skin development
GO:0044419	biological process involved in interspecies interaction between organisms	-2.65561	5.49085	1.02991	1	0	-3.6025	3.2822	null	biological process involved in interspecies interaction between organisms
GO:0045165	cell fate commitment	-8.65758	4.3046	0.0670691	0.580487	0.605716	-4.71741	-4.75468	null	cell fate commitment
GO:0045185	maintenance of protein location	-2.6216	4.08572	0.0405162	0.979748	0.201134	-0.0476102	3.38729	null	maintenance of protein location
GO:0071694	maintenance of protein location in extracellular region	-2.47625	2.48714	0.00101781	0.982406	0.739985	null	null	45185	maintenance of protein location
GO:0045229	external encapsulating structure organization	-14.7696	5.48854	1.02443	0.947018	0.406914	0.237741	6.03387	null	external encapsulating structure organization
GO:0045595	regulation of cell differentiation	-6.95861	4.8148	0.21714	0.833417	0.239575	5.28996	-3.71025	null	regulation of cell differentiation
GO:0022603	regulation of anatomical structure morphogenesis	-4.4318	5.3892	0.814981	0.821488	0.803326	null	null	45595	regulation of cell differentiation
GO:0051094	positive regulation of developmental process	-4.26761	4.7548	0.18912	0.80565	0.708712	null	null	45595	regulation of cell differentiation
GO:0045596	negative regulation of cell differentiation	-6.08619	4.39898	0.0833508	0.801103	0.664796	4.76756	-5.09392	null	negative regulation of cell differentiation
GO:0010721	negative regulation of cell development	-5.26761	3.94817	0.0295165	0.811161	0.863162	null	null	45596	negative regulation of cell differentiation
GO:0045597	positive regulation of cell differentiation	-2.43533	4.51972	0.110067	0.791601	0.894346	null	null	45596	negative regulation of cell differentiation
GO:0045664	regulation of neuron differentiation	-3.40894	3.98579	0.0321875	0.839728	0.808801	null	null	45596	negative regulation of cell differentiation
GO:0045665	negative regulation of neuron differentiation	-2.86967	3.42341	0.00881438	0.824283	0.799655	null	null	45596	negative regulation of cell differentiation
GO:0050767	regulation of neurogenesis	-3.46852	4.13274	0.0451496	0.80874	0.90619	null	null	45596	negative regulation of cell differentiation
GO:0050768	negative regulation of neurogenesis	-3.82391	3.65437	0.0150044	0.79964	0.826418	null	null	45596	negative regulation of cell differentiation
GO:0051147	regulation of muscle cell differentiation	-5.61979	3.66642	0.0154268	0.846445	0.77131	null	null	45596	negative regulation of cell differentiation
GO:0051148	negative regulation of muscle cell differentiation	-2.5376	3.29973	0.00662908	0.823557	0.930761	null	null	45596	negative regulation of cell differentiation
GO:0051150	regulation of smooth muscle cell differentiation	-2.40561	3.02119	0.00348916	0.854594	0.900124	null	null	45596	negative regulation of cell differentiation
GO:0051153	regulation of striated muscle cell differentiation	-3.58503	3.46746	0.00975569	0.846395	0.749659	null	null	45596	negative regulation of cell differentiation
GO:0051154	negative regulation of striated muscle cell differentiation	-3.1549	3.03262	0.0035823	0.829123	0.901342	null	null	45596	negative regulation of cell differentiation
GO:0051961	negative regulation of nervous system development	-3.63827	3.68744	0.0161918	0.809684	0.849252	null	null	45596	negative regulation of cell differentiation
GO:0051962	positive regulation of nervous system development	-2.37263	4.02715	0.0354039	0.794428	0.951491	null	null	45596	negative regulation of cell differentiation
GO:0060284	regulation of cell development	-3.09151	4.49357	0.103634	0.827753	0.876536	null	null	45596	negative regulation of cell differentiation
GO:0045743	positive regulation of fibroblast growth factor receptor signaling pathway	-4.01323	2.57978	0.00126062	0.843804	0.455479	1.81671	-6.52294	null	positive regulation of fibroblast growth factor receptor signaling pathway
GO:0017015	regulation of transforming growth factor beta receptor signaling pathway	-4	3.81518	0.0217299	0.83874	0.766533	null	null	45743	positive regulation of fibroblast growth factor receptor signaling pathway
GO:0030511	positive regulation of transforming growth factor beta receptor signaling pathway	-2.81816	3.08243	0.00401803	0.83193	0.907332	null	null	45743	positive regulation of fibroblast growth factor receptor signaling pathway
GO:0030512	negative regulation of transforming growth factor beta receptor signaling pathway	-2.43652	3.66586	0.0154069	0.81157	0.978181	null	null	45743	positive regulation of fibroblast growth factor receptor signaling pathway
GO:0040036	regulation of fibroblast growth factor receptor signaling pathway	-2.84466	3.22866	0.0056279	0.85333	0.829478	null	null	45743	positive regulation of fibroblast growth factor receptor signaling pathway
GO:0090100	positive regulation of transmembrane receptor protein serine/threonine kinase signaling pathway	-3.74473	3.67523	0.0157428	0.82978	0.888663	null	null	45743	positive regulation of fibroblast growth factor receptor signaling pathway
GO:1900746	regulation of vascular endothelial growth factor signaling pathway	-3.08092	2.98677	0.00322307	0.856306	0.804855	null	null	45743	positive regulation of fibroblast growth factor receptor signaling pathway
GO:1900748	positive regulation of vascular endothelial growth factor signaling pathway	-2.95468	2.48996	0.00102446	0.84418	0.940374	null	null	45743	positive regulation of fibroblast growth factor receptor signaling pathway
GO:1902547	regulation of cellular response to vascular endothelial growth factor stimulus	-3.08092	3.02036	0.00348251	0.867853	0.808187	null	null	45743	positive regulation of fibroblast growth factor receptor signaling pathway
GO:1903844	regulation of cellular response to transforming growth factor beta stimulus	-4	3.82125	0.0220359	0.854098	0.896653	null	null	45743	positive regulation of fibroblast growth factor receptor signaling pathway
GO:1903846	positive regulation of cellular response to transforming growth factor beta stimulus	-2.81816	3.08243	0.00401803	0.841312	0.907332	null	null	45743	positive regulation of fibroblast growth factor receptor signaling pathway
GO:0048569	post-embryonic animal organ development	-2.52433	3.6066	0.0134411	0.594526	0.610441	-5.24774	-4.77884	null	post-embryonic animal organ development
GO:0048583	regulation of response to stimulus	-3.23657	5.59008	1.29426	0.883157	0.265937	4.13854	-3.58793	null	regulation of response to stimulus
GO:0048584	positive regulation of response to stimulus	-4.67778	5.127	0.445598	0.814421	0.661484	2.89246	-5.19265	null	positive regulation of response to stimulus
GO:0048522	positive regulation of cellular process	-2.49485	5.68937	1.62674	0.8281	0.797265	null	null	48584	positive regulation of response to stimulus
GO:0048729	tissue morphogenesis	-12.1739	4.53071	0.112887	0.525373	0.65449	-4.97362	-4.59646	null	tissue morphogenesis
GO:0000902	cell morphogenesis	-5.23657	4.88413	0.254722	0.530221	0.810625	null	null	48729	tissue morphogenesis
GO:0001704	formation of primary germ layer	-8.82391	3.72795	0.0177751	0.541238	0.786639	null	null	48729	tissue morphogenesis
GO:0001706	endoderm formation	-4.11919	3.37236	0.00783648	0.538574	0.928441	null	null	48729	tissue morphogenesis
GO:0001707	mesoderm formation	-6.76955	3.50705	0.010687	0.524098	0.901615	null	null	48729	tissue morphogenesis
GO:0001710	mesodermal cell fate commitment	-2.92082	2.87216	0.00247468	0.544276	0.920487	null	null	48729	tissue morphogenesis
GO:0001837	epithelial to mesenchymal transition	-3.22185	3.51587	0.0109065	0.555321	0.90733	null	null	48729	tissue morphogenesis
GO:0002009	morphogenesis of an epithelium	-9.25181	4.45235	0.0942507	0.516398	0.793549	null	null	48729	tissue morphogenesis
GO:0002011	morphogenesis of an epithelial sheet	-5.95861	3.57008	0.0123568	0.564352	0.84918	null	null	48729	tissue morphogenesis
GO:0002040	sprouting angiogenesis	-3.69897	3.52621	0.0111693	0.538493	0.817201	null	null	48729	tissue morphogenesis
GO:0007369	gastrulation	-9.92082	3.99612	0.0329625	0.532426	0.819422	null	null	48729	tissue morphogenesis
GO:0007423	sensory organ development	-3.92082	4.52084	0.110349	0.545936	0.771593	null	null	48729	tissue morphogenesis
GO:0007498	mesoderm development	-5.06048	3.79127	0.0205658	0.587524	0.714467	null	null	48729	tissue morphogenesis
GO:0009887	animal organ morphogenesis	-10.7696	4.71839	0.173909	0.509021	0.73245	null	null	48729	tissue morphogenesis
GO:0016331	morphogenesis of embryonic epithelium	-2.30627	3.87651	0.0250262	0.507299	0.888452	null	null	48729	tissue morphogenesis
GO:0030323	respiratory tube development	-2.35556	3.84148	0.023087	0.538862	0.856472	null	null	48729	tissue morphogenesis
GO:0030324	lung development	-2.54212	3.8341	0.0226979	0.537207	0.85551	null	null	48729	tissue morphogenesis
GO:0030855	epithelial cell differentiation	-4.25964	4.42459	0.0884132	0.526101	0.880581	null	null	48729	tissue morphogenesis
GO:0031214	biomineral tissue development	-4.69897	3.77466	0.0197941	0.56012	0.712682	null	null	48729	tissue morphogenesis
GO:0035107	appendage morphogenesis	-2.6925	3.9465	0.0294034	0.5431	0.970311	null	null	48729	tissue morphogenesis
GO:0035108	limb morphogenesis	-2.89963	3.77619	0.019864	0.552022	0.94758	null	null	48729	tissue morphogenesis
GO:0035115	embryonic forelimb morphogenesis	-3.72125	3.1038	0.00422092	0.57205	0.719614	null	null	48729	tissue morphogenesis
GO:0035136	forelimb morphogenesis	-3.60206	3.21272	0.005425	0.579809	0.85674	null	null	48729	tissue morphogenesis
GO:0035239	tube morphogenesis	-5.38722	4.55263	0.118731	0.502244	0.735274	null	null	48729	tissue morphogenesis
GO:0035313	wound healing, spreading of epidermal cells	-3.08092	2.66276	0.00152672	0.559415	0.957973	null	null	48729	tissue morphogenesis
GO:0035987	endodermal cell differentiation	-3.67778	3.28035	0.0063397	0.534575	0.936046	null	null	48729	tissue morphogenesis
GO:0044319	wound healing, spreading of cells	-4.1549	3.05038	0.00373197	0.541209	0.907121	null	null	48729	tissue morphogenesis
GO:0048332	mesoderm morphogenesis	-6.50864	3.52994	0.0112658	0.568755	0.930905	null	null	48729	tissue morphogenesis
GO:0048333	mesodermal cell differentiation	-7.35655	3.16227	0.00482961	0.533183	0.952741	null	null	48729	tissue morphogenesis
GO:0048562	embryonic organ morphogenesis	-5.22185	4.2174	0.0548687	0.492494	0.875152	null	null	48729	tissue morphogenesis
GO:0048568	embryonic organ development	-4.56864	4.40081	0.0837033	0.50588	0.874411	null	null	48729	tissue morphogenesis
GO:0048598	embryonic morphogenesis	-10.5686	4.52436	0.111247	0.505373	0.708367	null	null	48729	tissue morphogenesis
GO:0048646	anatomical structure formation involved in morphogenesis	-6.25964	4.91533	0.273698	0.52819	0.785381	null	null	48729	tissue morphogenesis
GO:0048732	gland development	-2.31336	4.27203	0.0622229	0.560251	0.739411	null	null	48729	tissue morphogenesis
GO:0048754	branching morphogenesis of an epithelial tube	-3.95861	3.76664	0.0194315	0.516235	0.967921	null	null	48729	tissue morphogenesis
GO:0048762	mesenchymal cell differentiation	-3.40894	3.92691	0.0281062	0.533785	0.729381	null	null	48729	tissue morphogenesis
GO:0060026	convergent extension	-6.38722	3.3694	0.00778326	0.574155	0.825287	null	null	48729	tissue morphogenesis
GO:0060027	convergent extension involved in gastrulation	-5.69897	3.13956	0.00458348	0.542934	0.860634	null	null	48729	tissue morphogenesis
GO:0060173	limb development	-2.97062	3.90913	0.0269787	0.565017	0.879406	null	null	48729	tissue morphogenesis
GO:0060317	cardiac epithelial to mesenchymal transition	-2.57675	3.01662	0.00345258	0.530654	0.850766	null	null	48729	tissue morphogenesis
GO:0060429	epithelium development	-8.04096	4.79587	0.20788	0.531242	0.841973	null	null	48729	tissue morphogenesis
GO:0060485	mesenchyme development	-4.45593	4.06815	0.0389097	0.544396	0.745588	null	null	48729	tissue morphogenesis
GO:0060537	muscle tissue development	-5.13668	4.14414	0.0463503	0.569325	0.754608	null	null	48729	tissue morphogenesis
GO:0060562	epithelial tube morphogenesis	-2.85078	4.18662	0.0511134	0.492502	0.93207	null	null	48729	tissue morphogenesis
GO:0060795	cell fate commitment involved in formation of primary germ layer	-2.35262	3.12969	0.00448037	0.55556	0.859584	null	null	48729	tissue morphogenesis
GO:0061138	morphogenesis of a branching epithelium	-4.27572	3.90064	0.0264564	0.529064	0.891699	null	null	48729	tissue morphogenesis
GO:0090504	epiboly	-3.79588	3.29092	0.00649603	0.575477	0.816304	null	null	48729	tissue morphogenesis
GO:0090505	epiboly involved in wound healing	-4.1549	3.05038	0.00373197	0.548576	0.945579	null	null	48729	tissue morphogenesis
GO:0048736	appendage development	-2.81248	4.03197	0.0357997	0.564993	0.595701	-5.48726	-3.0798	null	appendage development
GO:0048745	smooth muscle tissue development	-2.3279	3.00903	0.0033927	0.620068	0.503	-4.93256	-5.26874	null	smooth muscle tissue development
GO:0048863	stem cell differentiation	-3.30103	3.98529	0.0321509	0.597146	0.573105	-4.54483	-4.83417	null	stem cell differentiation
GO:0048870	cell motility	-4.63827	5.13991	0.459043	0.995078	0.00945654	-2.42754	4.41912	null	cell motility
GO:0048880	sensory system development	-2.99568	4.37649	0.0791431	0.540822	0.635108	-5.05992	-3.28137	null	sensory system development
GO:0050765	negative regulation of phagocytosis	-2.63827	2.80277	0.0021088	0.885035	0.497914	4.36199	-6.75294	null	negative regulation of phagocytosis
GO:0050793	regulation of developmental process	-6.22915	5.54669	1.1712	0.884128	0.262943	3.8427	-3.62008	null	regulation of developmental process
GO:0050794	regulation of cellular process	-3.95861	6.78781	20.4058	0.847664	0.57175	4.07681	-4.04387	null	regulation of cellular process
GO:0050789	regulation of biological process	-3.42022	6.826	22.2818	0.850791	0.730641	null	null	50794	regulation of cellular process
GO:0050808	synapse organization	-8.16749	4.09889	0.0417635	0.948849	0.31825	-0.110615	5.97205	null	synapse organization
GO:0007416	synapse assembly	-3.30103	3.67265	0.0156497	0.546015	0.872131	null	null	50808	synapse organization
GO:0007528	neuromuscular junction development	-3.60206	3.34104	0.00729099	0.953381	0.833642	null	null	50808	synapse organization
GO:0034329	cell junction assembly	-3.27572	4.06047	0.0382278	0.948429	0.921901	null	null	50808	synapse organization
GO:0050890	cognition	-2.48413	4.01632	0.0345324	0.740744	0.580634	-6.05636	-0.650386	null	cognition
GO:0050896	response to stimulus	-7.49485	6.6446	14.674	1	0	-2.63932	3.31448	null	response to stimulus
GO:0051093	negative regulation of developmental process	-5.50864	4.62176	0.139217	0.817392	0.691629	4.89137	-5.01409	null	negative regulation of developmental process
GO:0051239	regulation of multicellular organismal process	-4.25181	5.20648	0.535086	0.891198	0.241618	4.66233	-3.49792	null	regulation of multicellular organismal process
GO:0051241	negative regulation of multicellular organismal process	-5.92082	4.67774	0.158373	0.833887	0.214571	4.2175	-5.81772	null	negative regulation of multicellular organismal process
GO:0010614	negative regulation of cardiac muscle hypertrophy	-2.40561	2.80482	0.00211878	0.832712	0.759366	null	null	51241	negative regulation of multicellular organismal process
GO:0014741	negative regulation of muscle hypertrophy	-2.40561	2.83059	0.0022485	0.863944	0.921076	null	null	51241	negative regulation of multicellular organismal process
GO:0044057	regulation of system process	-2.6038	4.44365	0.0923813	0.866002	0.774473	null	null	51241	negative regulation of multicellular organismal process
GO:0051960	regulation of nervous system development	-3.30103	4.24289	0.0581849	0.82419	0.748709	null	null	51241	negative regulation of multicellular organismal process
GO:1903522	regulation of blood circulation	-2.42136	4.16741	0.0489015	0.869395	0.739461	null	null	51241	negative regulation of multicellular organismal process
GO:2000026	regulation of multicellular organismal development	-4.67778	4.85146	0.236265	0.810259	0.832672	null	null	51241	negative regulation of multicellular organismal process
GO:0060071	Wnt signaling pathway, planar cell polarity pathway	-3.58503	3.0086	0.00338938	0.805797	0.636744	5.66331	-1.0012	null	Wnt signaling pathway, planar cell polarity pathway
GO:0090175	regulation of establishment of planar polarity	-3.04576	3.22634	0.00559796	0.867528	0.874251	null	null	60071	Wnt signaling pathway, planar cell polarity pathway
GO:0060541	respiratory system development	-3.13668	3.97525	0.0314158	0.563358	0.589676	-5.20272	-3.01395	null	respiratory system development
GO:0060560	developmental growth involved in morphogenesis	-5.34679	3.99813	0.0331155	0.573843	0.592092	-4.76359	-4.49746	null	developmental growth involved in morphogenesis
GO:0003401	axis elongation	-3.08092	3.21484	0.00545161	0.611288	0.790875	null	null	60560	developmental growth involved in morphogenesis
GO:0016049	cell growth	-3.20761	3.99145	0.0326099	0.978337	0.866204	null	null	60560	developmental growth involved in morphogenesis
GO:0048588	developmental cell growth	-4.46852	3.82458	0.0222056	0.585584	0.858497	null	null	60560	developmental growth involved in morphogenesis
GO:0048589	developmental growth	-3.67778	4.41338	0.0861614	0.594009	0.922053	null	null	60560	developmental growth involved in morphogenesis
GO:0060713	labyrinthine layer morphogenesis	-2.95468	2.86747	0.00244807	0.569958	0.492388	-4.96166	-3.0597	null	labyrinthine layer morphogenesis
GO:0061061	muscle structure development	-6.13077	4.44297	0.092235	0.589956	0.64332	-5.0083	-4.76429	null	muscle structure development
GO:0061351	neural precursor cell proliferation	-3.12494	3.66474	0.015367	0.992249	0.00618832	3.06647	5.93021	null	neural precursor cell proliferation
GO:0007405	neuroblast proliferation	-2.86328	3.40518	0.00845183	0.564061	0.748657	null	null	61351	neural precursor cell proliferation
GO:0065007	biological regulation	-3.92082	6.84078	23.0527	1	0	-1.81878	6.33431	null	biological regulation
GO:0071300	cellular response to retinoic acid	-4.88606	3.29403	0.0065426	0.935831	0.663867	4.98569	2.88878	null	cellular response to retinoic acid
GO:0071363	cellular response to growth factor stimulus	-5.49485	4.44006	0.0916196	0.897323	0.286686	5.487	2.62048	null	cellular response to growth factor stimulus
GO:0007179	transforming growth factor beta receptor signaling pathway	-5.34679	3.91482	0.0273346	0.805471	0.916419	null	null	71363	cellular response to growth factor stimulus
GO:0008543	fibroblast growth factor receptor signaling pathway	-3.34679	3.6807	0.0159424	0.811316	0.885026	null	null	71363	cellular response to growth factor stimulus
GO:0030509	BMP signaling pathway	-3.29243	3.60379	0.0133546	0.813012	0.875177	null	null	71363	cellular response to growth factor stimulus
GO:0035924	cellular response to vascular endothelial growth factor stimulus	-2.49621	3.60108	0.0132715	0.908607	0.874834	null	null	71363	cellular response to growth factor stimulus
GO:0038084	vascular endothelial growth factor signaling pathway	-2.3019	3.50229	0.0105706	0.816519	0.862509	null	null	71363	cellular response to growth factor stimulus
GO:0044344	cellular response to fibroblast growth factor stimulus	-3.58503	3.74873	0.0186466	0.905881	0.989443	null	null	71363	cellular response to growth factor stimulus
GO:0070848	response to growth factor	-5.61979	4.45045	0.0938382	0.910981	0.715579	null	null	71363	cellular response to growth factor stimulus
GO:0071495	cellular response to endogenous stimulus	-2.84771	5.21391	0.544319	0.899321	0.820225	null	null	71363	cellular response to growth factor stimulus
GO:0071559	response to transforming growth factor beta	-4.50864	4.00026	0.0332784	0.903704	0.928438	null	null	71363	cellular response to growth factor stimulus
GO:0071560	cellular response to transforming growth factor beta stimulus	-4.58503	3.99043	0.0325334	0.903027	0.986158	null	null	71363	cellular response to growth factor stimulus
GO:0071772	response to BMP	-3.26761	3.6466	0.0147383	0.908237	0.880632	null	null	71363	cellular response to growth factor stimulus
GO:0071773	cellular response to BMP stimulus	-3.26761	3.6465	0.014735	0.907033	0.994285	null	null	71363	cellular response to growth factor stimulus
GO:0071774	response to fibroblast growth factor	-3.19382	3.75374	0.0188628	0.906908	0.894587	null	null	71363	cellular response to growth factor stimulus
GO:0072001	renal system development	-7.20761	4.15467	0.0474879	0.553554	0.609162	-5.33032	-3.09012	null	renal system development
GO:0072359	circulatory system development	-7.67778	4.68108	0.159593	0.522141	0.674561	-5.2638	-3.40441	null	circulatory system development
GO:0072593	reactive oxygen species metabolic process	-2.48945	4.89958	0.263949	0.994568	0.0571904	-2.03642	5.267	null	reactive oxygen species metabolic process
GO:0090092	regulation of transmembrane receptor protein serine/threonine kinase signaling pathway	-3.76955	4.15918	0.0479835	0.850629	0.564515	2.60443	-6.13473	null	regulation of transmembrane receptor protein serine/threonine kinase signaling pathway
GO:0090287	regulation of cellular response to growth factor stimulus	-5.69897	4.19471	0.0520747	0.864219	0.194664	2.44084	-6.14123	null	regulation of cellular response to growth factor stimulus
GO:0090596	sensory organ morphogenesis	-4.52288	4.21101	0.0540671	0.527449	0.672648	-5.12385	-4.49501	null	sensory organ morphogenesis
GO:0001654	eye development	-2.73993	4.34577	0.0737381	0.510538	0.981732	null	null	90596	sensory organ morphogenesis
GO:0042471	ear morphogenesis	-4.00436	3.76842	0.0195114	0.513776	0.91869	null	null	90596	sensory organ morphogenesis
GO:0042472	inner ear morphogenesis	-4.19382	3.69767	0.0165777	0.517694	0.838297	null	null	90596	sensory organ morphogenesis
GO:0042476	odontogenesis	-3.82391	3.63538	0.0143624	0.563134	0.774948	null	null	90596	sensory organ morphogenesis
GO:0043010	camera-type eye development	-2.9431	4.23862	0.0576161	0.517007	0.908002	null	null	90596	sensory organ morphogenesis
GO:0043583	ear development	-2.84466	4.03627	0.0361556	0.567179	0.880612	null	null	90596	sensory organ morphogenesis
GO:0048645	animal organ formation	-3.60206	3.32243	0.00698498	0.574378	0.742264	null	null	90596	sensory organ morphogenesis
GO:0048839	inner ear development	-3.06048	3.987	0.0322773	0.568725	0.955608	null	null	90596	sensory organ morphogenesis
GO:0070307	lens fiber cell development	-2.82391	2.74741	0.00185601	0.551605	0.738631	null	null	90596	sensory organ morphogenesis
GO:0150063	visual system development	-2.73993	4.34807	0.0741306	0.53859	0.989773	null	null	90596	sensory organ morphogenesis
GO:0090598	male anatomical structure morphogenesis	-2.92445	2.77525	0.00197908	0.60089	0.48571	-5.11291	-2.77002	null	male anatomical structure morphogenesis
GO:0030539	male genitalia development	-2.40561	3.02119	0.00348916	0.582193	0.917606	null	null	90598	male anatomical structure morphogenesis
GO:0035112	genitalia morphogenesis	-2.63827	2.83759	0.00228509	0.570786	0.726841	null	null	90598	male anatomical structure morphogenesis
GO:0048808	male genitalia morphogenesis	-2.77211	2.5832	0.0012706	0.581674	0.875396	null	null	90598	male anatomical structure morphogenesis
GO:0097475	motor neuron migration	-2.3279	2.77815	0.00199238	0.59062	0.625709	-5.41666	-2.57663	null	motor neuron migration
GO:0098609	cell-cell adhesion	-11.4089	4.94455	0.292744	0.963818	0.00906217	-4.35609	4.91521	null	cell-cell adhesion
GO:0007156	homophilic cell adhesion via plasma membrane adhesion molecules	-5.24413	4.81302	0.216252	0.961895	0.952127	null	null	98609	cell-cell adhesion
GO:0007160	cell-matrix adhesion	-6.92082	4.04805	0.0371501	0.96637	0.716338	null	null	98609	cell-cell adhesion
GO:0031589	cell-substrate adhesion	-7.76955	4.16808	0.048978	0.967439	0.731053	null	null	98609	cell-cell adhesion
GO:0034446	substrate adhesion-dependent cell spreading	-2.42251	3.30038	0.00663906	0.969227	0.869718	null	null	98609	cell-cell adhesion
GO:0098742	cell-cell adhesion via plasma-membrane adhesion molecules	-7.55284	4.83689	0.228469	0.961935	0.825541	null	null	98609	cell-cell adhesion
GO:0098810	neurotransmitter reuptake	-3.49485	3.07773	0.00397479	0.895503	0.637128	1.22102	0.532535	null	neurotransmitter reuptake
GO:0001504	neurotransmitter uptake	-2.91009	3.17811	0.00500923	0.899556	0.751084	null	null	98810	neurotransmitter reuptake
GO:0098900	regulation of action potential	-2.45967	3.21511	0.00545494	0.916866	0.163832	1.73625	-0.919228	null	regulation of action potential
GO:0120036	plasma membrane bounded cell projection organization	-3.60206	5.04861	0.37201	0.933772	0.462796	0.166733	5.82855	null	plasma membrane bounded cell projection organization
GO:1900115	extracellular regulation of signal transduction	-2.47625	2.6637	0.00153004	0.876478	0.46021	1.75793	-7.08997	null	extracellular regulation of signal transduction
GO:1901388	regulation of transforming growth factor beta activation	-3	2.62737	0.00140697	0.85803	0.590541	1.63162	-7.45658	null	regulation of transforming growth factor beta activation
GO:1901888	regulation of cell junction assembly	-2.4437	4.06134	0.0383043	0.900741	0.586102	3.03327	-3.24331	null	regulation of cell junction assembly
GO:1902742	apoptotic process involved in development	-2.92445	3.14333	0.00462339	0.648088	0.513496	-4.53976	-5.37321	null	apoptotic process involved in development
GO:1905332	positive regulation of morphogenesis of an epithelium	-2.3279	3.14489	0.00464002	0.840906	0.54561	2.77456	-3.83702	null	positive regulation of morphogenesis of an epithelium
GO:1990314	cellular response to insulin-like growth factor stimulus	-2.5376	2.12057	0.00043573	0.921418	0.536225	5.16232	3.18081	null	cellular response to insulin-like growth factor stimulus
GO:2000027	regulation of animal organ morphogenesis	-4.46852	3.66502	0.0153769	0.861863	0.589448	6.19131	-3.33417	null	regulation of animal organ morphogenesis
GO:2000050	regulation of non-canonical Wnt signaling pathway	-2.77211	2.96473	0.00306341	0.872021	0.478005	1.99011	-6.90825	null	regulation of non-canonical Wnt signaling pathway
GO:2000179	positive regulation of neural precursor cell proliferation	-4.63827	3.36342	0.00767683	0.86547	0.18198	2.04747	-4.38488	null	positive regulation of neural precursor cell proliferation
GO:0002052	positive regulation of neuroblast proliferation	-3.74473	3.11461	0.00432736	0.794089	0.921649	null	null	2000179	positive regulation of neural precursor cell proliferation
GO:0008284	positive regulation of cell population proliferation	-3.67778	4.56235	0.121419	0.84472	0.74394	null	null	2000179	positive regulation of neural precursor cell proliferation
GO:1902692	regulation of neuroblast proliferation	-3.00877	3.29994	0.0066324	0.898493	0.942259	null	null	2000179	positive regulation of neural precursor cell proliferation
GO:2000177	regulation of neural precursor cell proliferation	-3.16749	3.57054	0.0123701	0.898023	0.76653	null	null	2000179	positive regulation of neural precursor cell proliferation
GO:2000209	regulation of anoikis	-2.84466	2.9345	0.00285719	0.913646	0.642413	2.06074	-8.04928	null	regulation of anoikis
GO:2000811	negative regulation of anoikis	-2.92082	2.8169	0.00217865	0.882718	0.421133	3.87783	-7.0753	null	negative regulation of anoikis
